# Supplementary figures and images for: Outcomes of a Novel Autografting Procedure Combining Two Synergistic Techniques in One Stage for Improved Wound Healing: Two Case Reports
Source: PubMed Central journal article supplement — Plast Reconstr Surg Glob Open. 2024 Dec 20;12(12):e6369. doi: 10.1097/GOX.0000000000006369 (PMC11661756; doi:10.1097/gox.0000000000006369), 2024-12-20

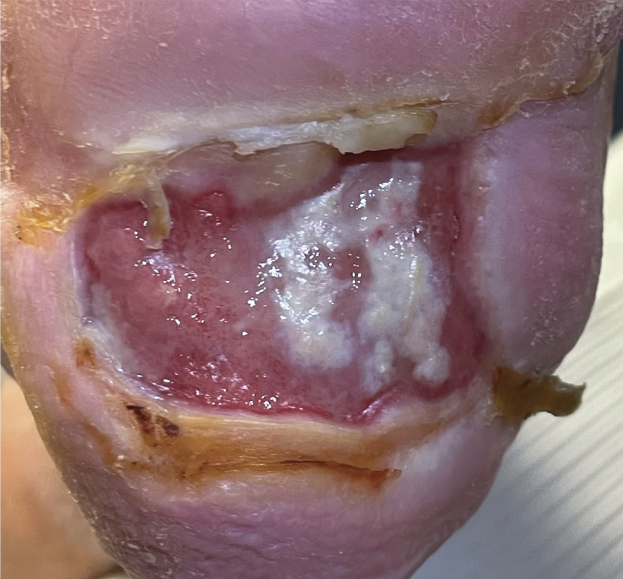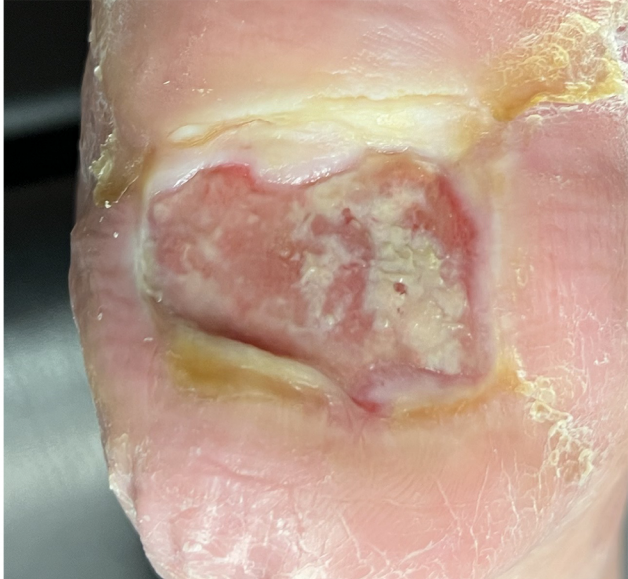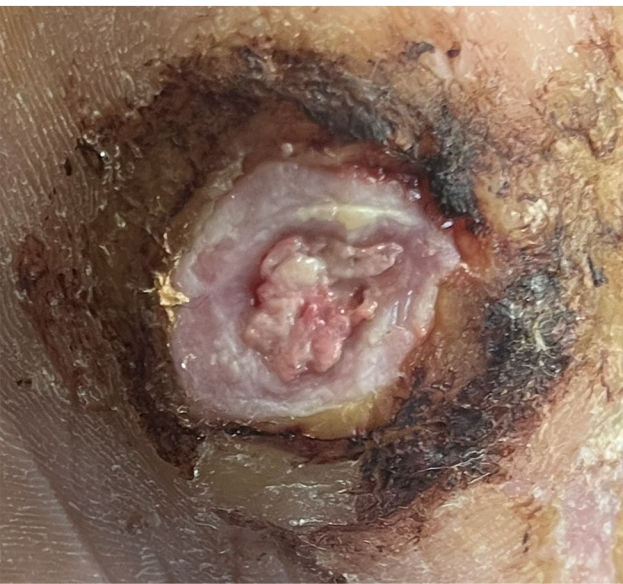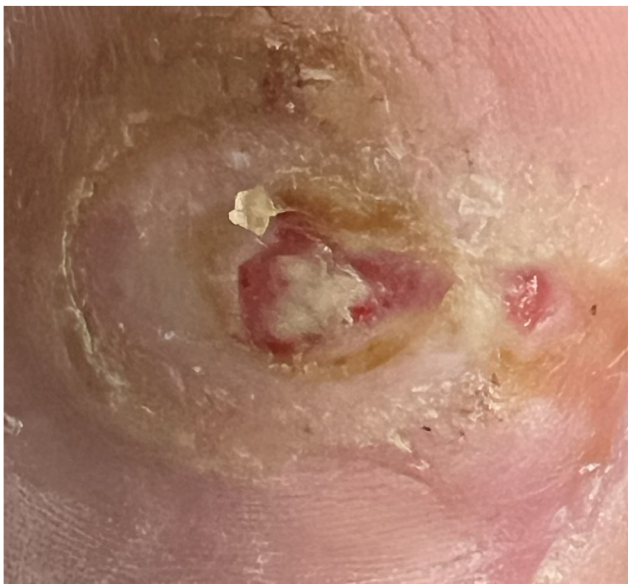

Supplement: gox-12-e6369-s002.pdf [file gox-12-e6369-s002.pdf]
